# Supplementary material for: A highly efficient heterogeneous catalytic system for Heck reactions with a palladium colloid layer reduced in situ in the channel of mesoporous silica materialsElectronic supplementary information (ESI) available: experimental details. See http://www.rsc.org/suppdata/cc/b4/b404916k/
Source: Royal Society of Chemistry journal article supplement (doi:10.1039/b404916k), 2004-01-01
Supplement: b404916k.doc [file b404916k.doc]

**Supporting information:**

*Preparation of SBA-H:* SBA-15(1.5g) was dispersed in dry CH3Cl (50ml) and (CH3O)3SiH (10ml) was added dropwise under stirring. The mixture was filtered after been fluxed under N2 atmosphere for 24h. The solid obtained after repeated washing with CH3Cl to eliminate the resident was named SBA-H.

*Preparation of Pd-SBA:* SBA-H (1.5g) was dispersed in dry THF (20ml) and 0.05M Pd(Ac)2 THF solution (30ml) was added slowly afterwards. After stirring for 4h, the solid was filtered washed with THF and dried in vacuum at room temperature.

*Characterization:* The XRD patterns of prepared samples were recorded in a Rigaku D/MAX-2200PC X-ray diffractometer using Cu Kαradiation (40kV 40mA). High resolution TEM (HRTEM) images and energy disperse spectra (EDS) were conducted with a JEOL 200CX electron microscope operated at 200kV. N2 adsorption and desorption isotherms were measured at 77K on a micromeritics Tristar 3000 system. The specific surface area and the pore size distribution were calculated using the BET and Barrett-Joyner-Halenda (BJH) methods, respectively. XPS was performed on a VG Microlab MK-α(Mg Kα–300w) system.

*Catalytic studies:* The 20mmol aryl halide, 30mmol vinyl substrate, 22mmol triethylamine, 10mmol dodecane (as internal standard for GC analysis) and 20ml NMP were introduced into three neck flask, and catalyst (Pd-SBA) was added through funnel and reaction mixture was heated to reaction temperature (mol% catalyst used, reaction time and temperature are shown in Table 1).

*Heterogeneous Test:* To sure that the catalysis runs were based on a heterogeneous pathway, the reaction of 4-BrPhC(O)CH3 with methyl acrylate was carried out in a similar manner as the general procedure for Heck reactions, with the exception that the catalyst was filtered off after approximately 20% conversion. The resulting solution was heated under the identical reaction condition for an additional 2 h and analyzed for further conversion. No further reaction was noted after the catalyst removal. This experiment indicated that the Heck reactions we investigated followed a heterogeneous pathway.

Figure 2. Nitrogen adsorption/desorption isotherms of (a) SBA-H (b) Pd-SBA

Figure 1.Small-angle XRD patterns of (a) SBA-H, (b) Pd-SBA

Figure 3. EDAX results of Pd-SBA

**Table** 1***.*** Conversions and yields for Heck reaction of 4-BrPhC(O)CH3

with methyl acrylate at 120 oC with 0.02mol% catalyst after different cycles

| Cycle | Conversion (yield) (%) (50min) |
| --- | --- |
| 1 | 100 (99) |
| 2 | 99 (99) |
| 3 | 98 (99) |
| 4 | 98 (99) |
| 5 | 98 (99) |
